# Supplementary material
Source: PubMed Central journal article supplement (PMC3730521)

## SUPPLEMENTAL FIGURE LEGENDS

**Supplemental Figure 1. High maltose does not potentiate bezafibrate-induced expression of fatty acid oxidation genes in WT hepatocytes.** mRNAs of CPT1A (A), CPT2 (B) and ACOX1 (C) were measured by qPCR in L-FABP (+/+) hepatocytes treated with serum-free medium containing 6mM glucose or [6mM glucose + 14 mM maltose] along with fatty acid-free albumin (Alb, 40 $\mu$ M) or Alb complexed with bezafibrate (BZ, 200  $\mu$ M) or stearic acid (C18:0, 200  $\mu$ M). Mean  $\pm$  SE, n= 3-4. \* = p<0.05 for lipidic ligand addition vs. albumin at each glucose concentration.

**Supplemental Figure 2. Effect of bezafibrate (BZ) on L-FABP distribution to hepatocyte nuclei.** Hepatocytes from L-FABP (+/+) mice were treated with 6 or 20 mM glucose and fatty acid-free albumin (Alb, 40  $\mu$ M) or Alb complexed with bezafibrate (BZ, 200  $\mu$ M) or stearic acid (C18:0, 200  $\mu$ M). After 1, and 24 h incubation, cells were fixed and labeled with FITC-anti L-FABP and TO-PRO nuclear stain, and analyzed similarly as we established previously [29,30,117]. Representative confocal fluorescence images of L-FABP (green, 1<sup>st</sup> column), nuclei (red, 2<sup>nd</sup> column), and colocalized pixels (yellow, 3<sup>rd</sup> column) of hepatocytes treated with 6 mM glucose and fatty acid-free Alb or Alb/BZ complex of Alb/C18:0 complex for 1 hr (A), 24 hr (B), or 20 mM glucose and fatty acid-free Alb or Alb/BZ complex of Alb/C18:0 complex for 1 hr (C), or 24 hr (D).

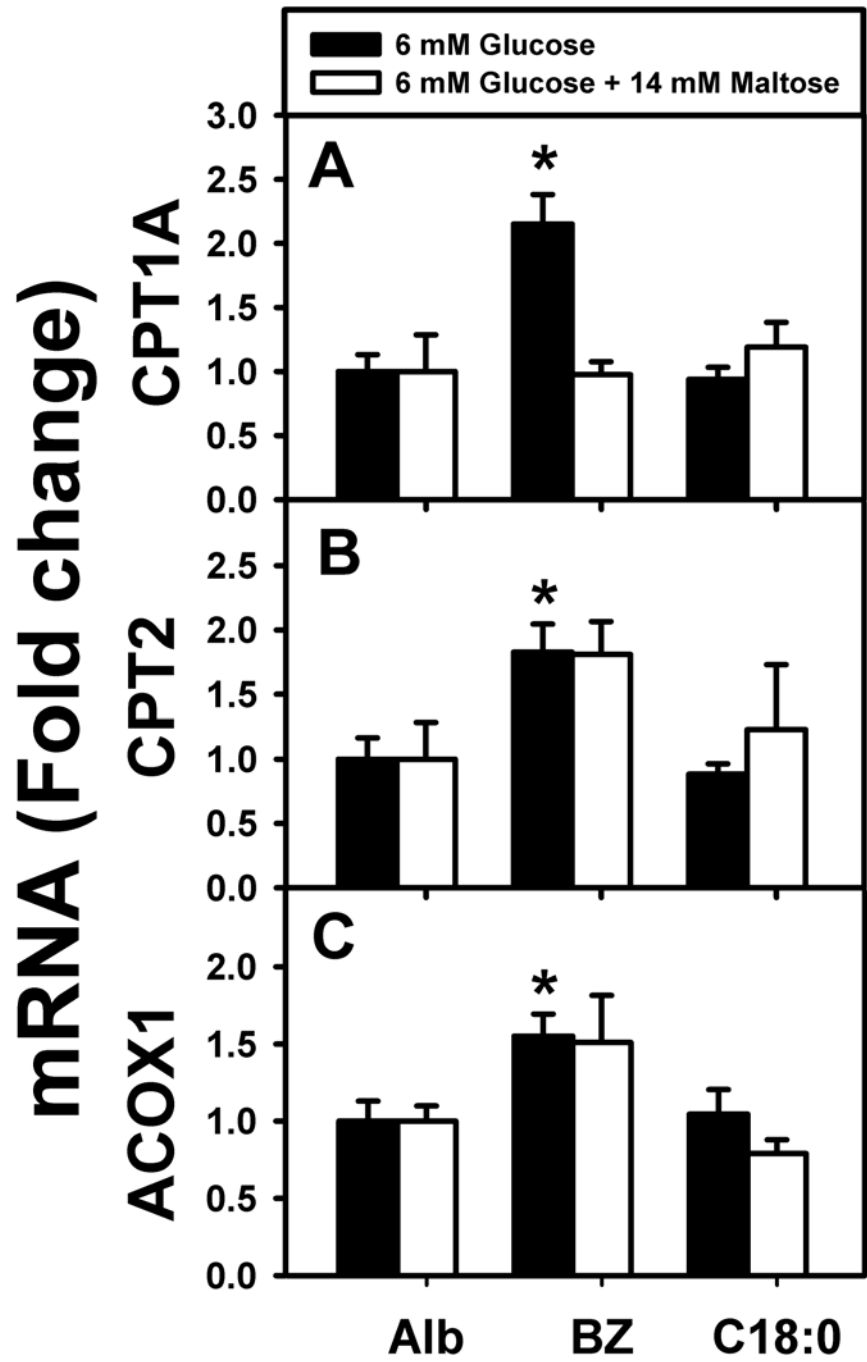

Supplemental Figure 1

6 mM Glucose:

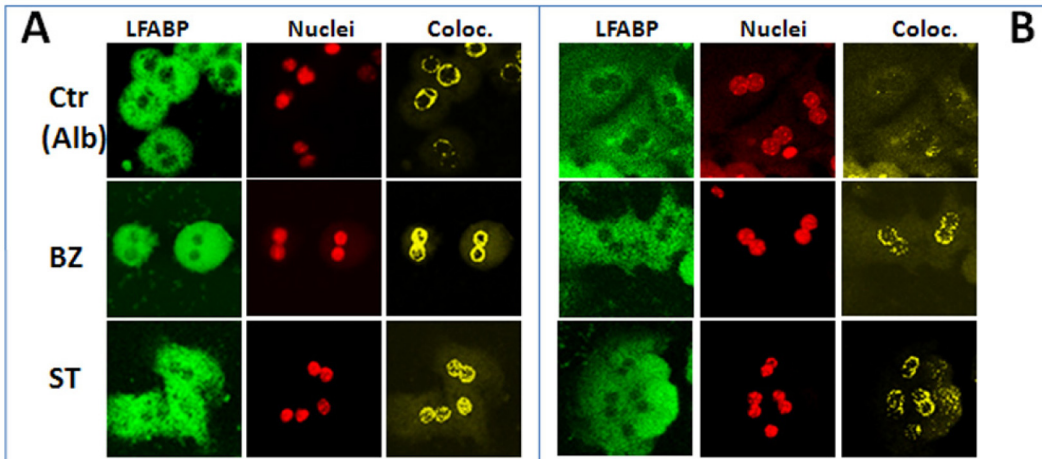

20 mM Glucose:

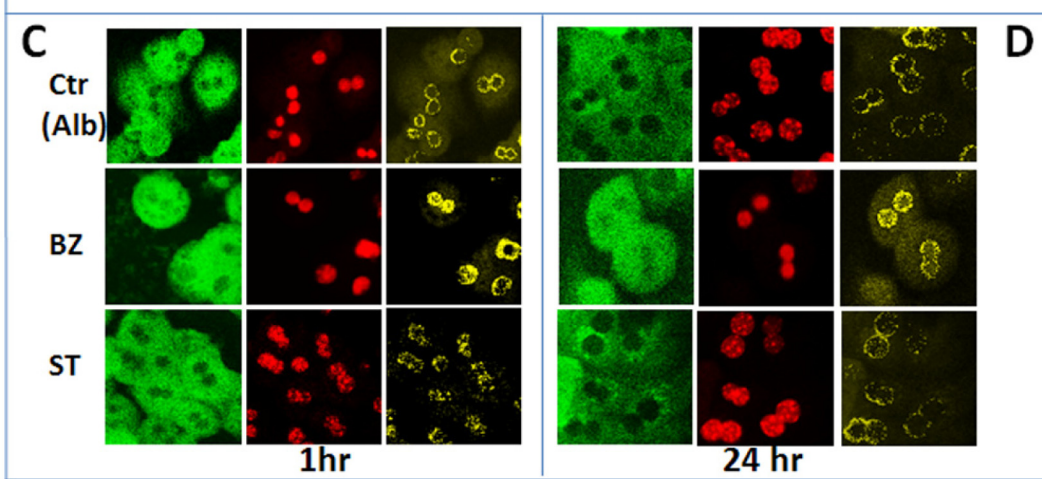

Supplement: NIHMS492864-supplement-01.pdf [file NIHMS492864-supplement-01.pdf]
